# Supplementary material
Source: HighWire-hosted journal article supplement (https://www.cmaj.ca/highwire/filestream/58060/field_highwire_adjunct_files/0/mortality--f1-fe.pdf)

**Incidence of nosocomial, *Clostridium difficile*-  
associated diarrhea by region in Quebec,  
22 Aug – 11 Dec, 2004**

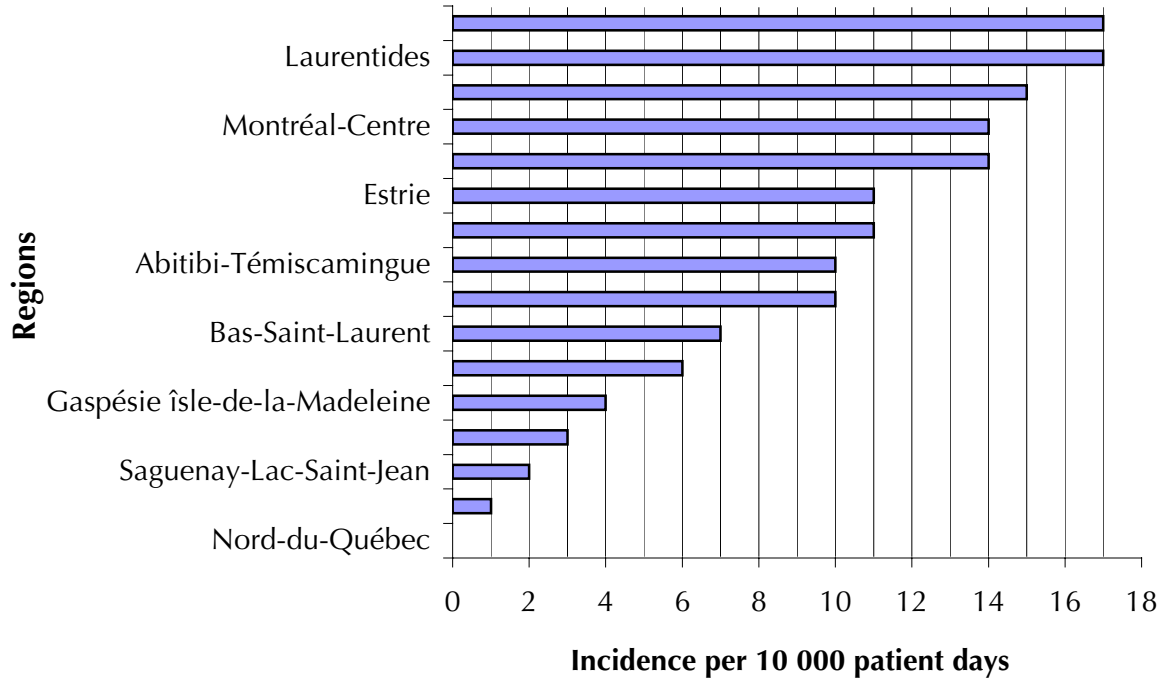

Supplement: mortality--f1-fe.pdf [file mortality--f1-fe.pdf]
